# Supplementary material for: Highly Active Antiretroviral Therapies Are Effective against HIV-1 Cell-to-Cell Transmission
Source: PubMed Central journal article supplement (PMC3937346; doi:10.1371/journal.ppat.1003982), 2014-02-27

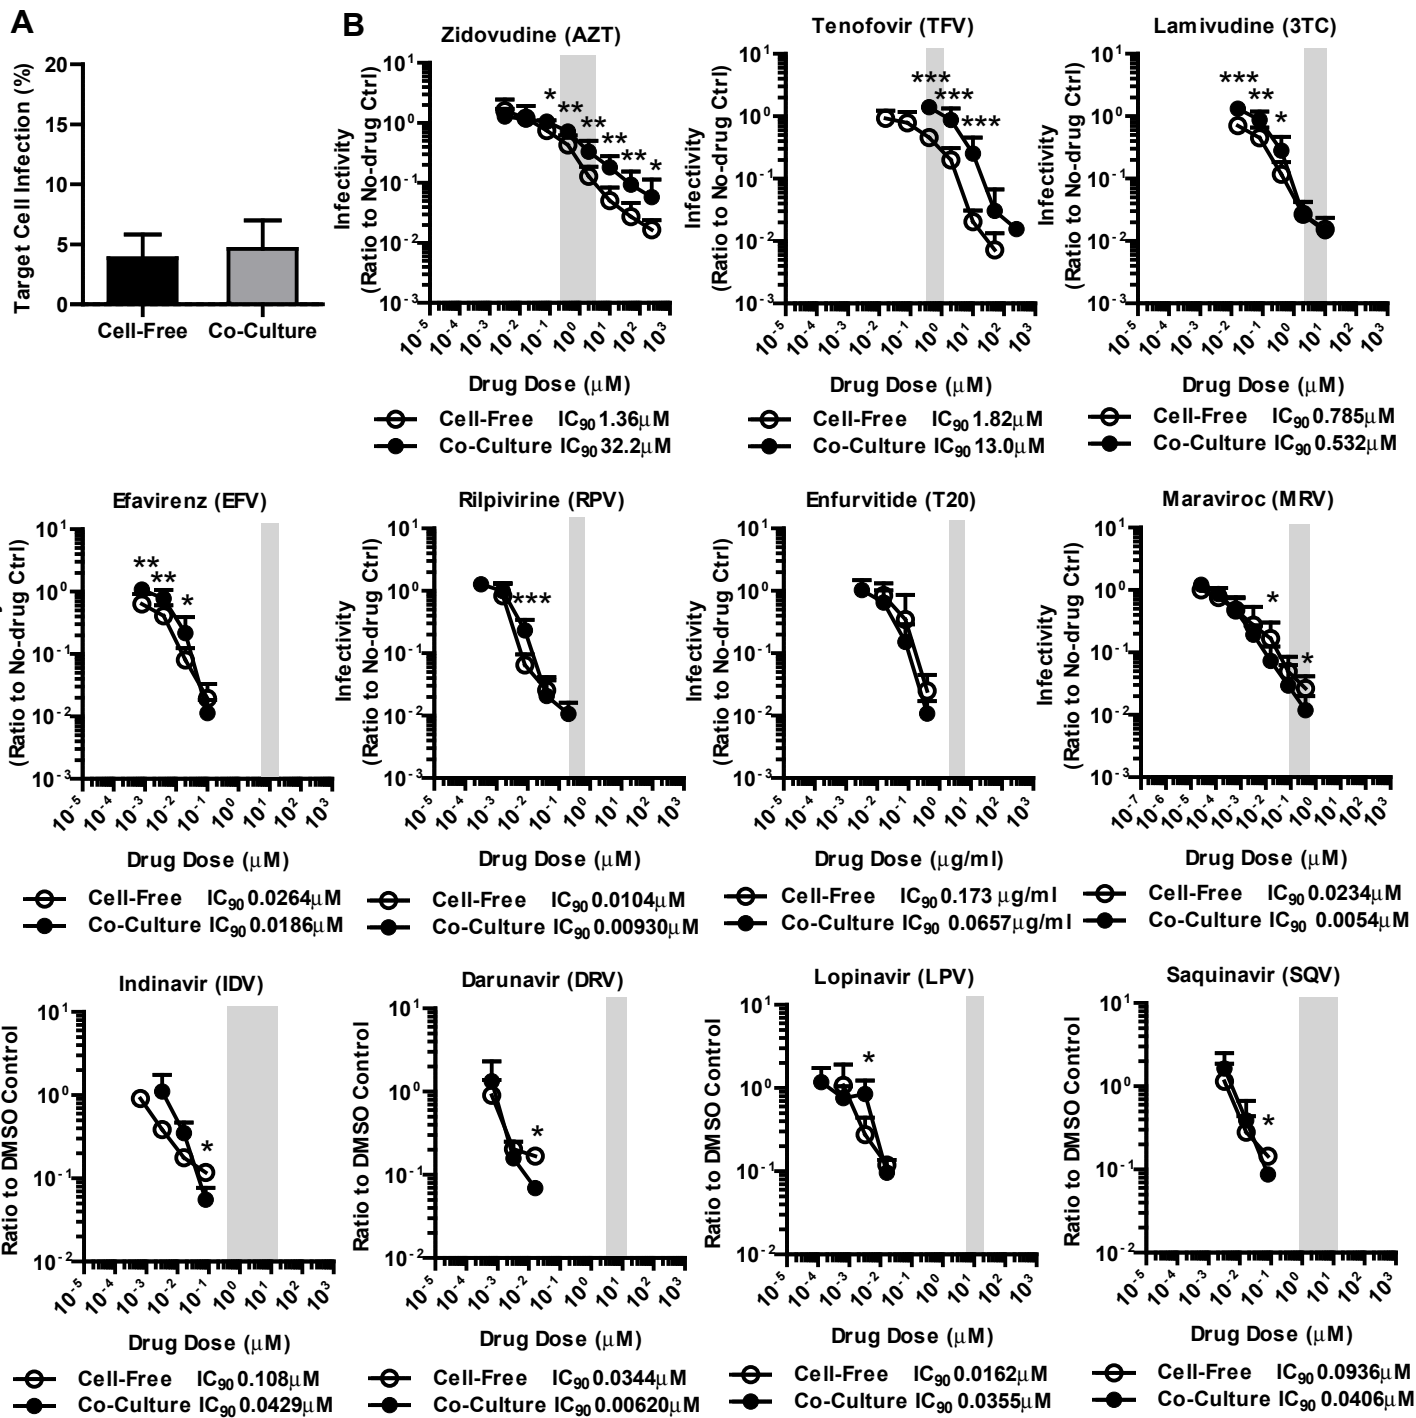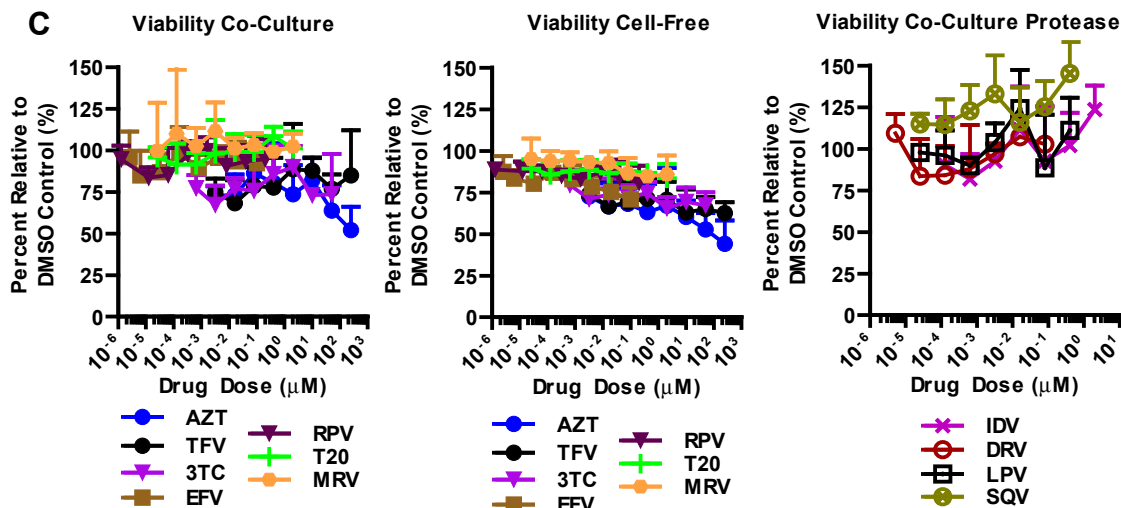

Supplement: ppat.1003982.s005.pdf [file ppat.1003982.s005.pdf]
